# Supplementary material for: A newer approach of growing methyl-p-hydroxybenzoate (p-MHB) single crystals from a melt without a polymorphic change in their form
Source: Royal Society of Chemistry journal article supplement (doi:10.1039/c6ce01342b), 2016-01-01
Supplement: c6ce01342b1.pdf [file c6ce01342b1.pdf]

## Supporting Information

### (i) Solution grown p-MHB crystal

#### Atomic displacement parameters (Å<sup>2</sup>)

|     | U <sub>11</sub> | U <sub>22</sub> | U <sub>33</sub> | U <sub>23</sub> | U <sub>13</sub> | U <sub>12</sub> |
|-----|-----------------|-----------------|-----------------|-----------------|-----------------|-----------------|
| O2  | 0.0474(10)      | 0.0507(10)      | 0.0336(8)       | -0.0020(8)      | 0.0158(7)       | -0.0086(8)      |
| O3  | 0.0552(11)      | 0.0605(11)      | 0.0327(10)      | -0.0010(8)      | 0.0071(9)       | -0.0048(9)      |
| O8  | 0.0496(11)      | 0.0484(10)      | 0.0368(9)       | 0.0011(8)       | 0.0178(8)       | 0.0115(9)       |
| O5  | 0.0555(11)      | 0.0491(10)      | 0.0427(9)       | -0.0002(8)      | 0.0224(8)       | 0.0079(9)       |
| O6  | 0.0597(12)      | 0.0518(11)      | 0.0409(11)      | 0.0004(8)       | 0.0087(9)       | 0.0051(9)       |
| O9  | 0.0508(11)      | 0.0511(11)      | 0.0377(11)      | 0.0017(8)       | 0.0080(9)       | 0.0068(9)       |
| O7  | 0.0604(15)      | 0.0572(13)      | 0.0504(14)      | -0.0015(10)     | 0.0223(12)      | 0.0193(11)      |
| O1  | 0.0604(13)      | 0.0562(12)      | 0.0434(11)      | 0.0008(9)       | 0.0207(10)      | -0.0129(10)     |
| O4  | 0.0597(13)      | 0.0659(14)      | 0.0480(12)      | 0.0003(10)      | 0.0197(11)      | 0.0198(11)      |
| C18 | 0.0438(15)      | 0.0433(14)      | 0.0332(14)      | -0.0031(11)     | 0.0191(12)      | -0.0001(12)     |
| C1  | 0.0377(13)      | 0.0414(12)      | 0.0275(12)      | 0.0000(9)       | 0.0151(11)      | 0.0072(10)      |
| C9  | 0.0386(13)      | 0.0392(12)      | 0.0355(14)      | -0.0013(10)     | 0.0160(11)      | -0.0067(11)     |
| C23 | 0.0357(14)      | 0.0383(13)      | 0.0351(14)      | 0.0011(10)      | 0.0155(12)      | -0.0058(10)     |
| C22 | 0.0396(15)      | 0.0505(15)      | 0.0293(13)      | -0.0009(11)     | 0.0083(12)      | 0.0022(12)      |
| C20 | 0.0386(14)      | 0.0405(14)      | 0.0422(16)      | -0.0003(11)     | 0.0193(12)      | 0.0010(11)      |
| C7  | 0.0393(13)      | 0.0415(13)      | 0.0293(12)      | -0.0015(9)      | 0.0140(11)      | 0.0057(10)      |
| C3  | 0.0396(14)      | 0.0491(15)      | 0.0262(12)      | -0.0021(10)     | 0.0112(11)      | 0.0011(12)      |
| C15 | 0.0439(14)      | 0.0357(12)      | 0.0386(14)      | -0.0013(10)     | 0.0171(12)      | -0.0073(10)     |
| C19 | 0.0419(15)      | 0.0477(15)      | 0.0333(14)      | 0.0023(11)      | 0.0163(13)      | 0.0013(12)      |
| C17 | 0.0347(13)      | 0.0369(13)      | 0.0339(14)      | 0.0001(10)      | 0.0155(12)      | -0.0036(10)     |
| C6  | 0.0435(13)      | 0.0525(15)      | 0.0251(11)      | 0.0003(10)      | 0.0131(10)      | 0.0029(11)      |
| C5  | 0.0488(16)      | 0.0523(15)      | 0.0303(13)      | 0.0074(11)      | 0.0175(13)      | 0.0027(12)      |
| C13 | 0.0438(14)      | 0.0561(16)      | 0.0325(14)      | 0.0032(11)      | 0.0139(12)      | 0.0016(12)      |
| C11 | 0.0499(18)      | 0.0612(17)      | 0.0360(15)      | -0.0110(13)     | 0.0162(14)      | 0.0025(14)      |
| C21 | 0.0527(18)      | 0.0542(16)      | 0.0339(15)      | -0.0094(12)     | 0.0165(14)      | 0.0027(13)      |
| C10 | 0.0496(15)      | 0.0521(15)      | 0.0311(12)      | -0.0032(11)     | 0.0143(12)      | -0.0022(12)     |
| C4  | 0.0410(13)      | 0.0420(13)      | 0.0363(14)      | 0.0009(10)      | 0.0193(12)      | 0.0035(10)      |
| C8  | 0.0515(16)      | 0.0523(13)      | 0.0476(14)      | -0.0056(11)     | 0.0237(13)      | -0.0107(12)     |
| C12 | 0.0396(14)      | 0.0475(14)      | 0.0419(16)      | -0.0018(11)     | 0.0173(12)      | -0.0010(11)     |
| C24 | 0.0483(17)      | 0.0416(15)      | 0.0560(19)      | 0.0007(14)      | 0.0253(15)      | 0.0066(13)      |
| C16 | 0.0576(19)      | 0.0439(14)      | 0.0591(18)      | 0.0004(13)      | 0.0302(16)      | 0.0019(13)      |
| C2  | 0.0426(14)      | 0.0471(14)      | 0.0248(12)      | 0.0033(9)       | 0.0146(11)      | 0.0024(11)      |

#### Bond length (Å)

|          |          |          |          |
|----------|----------|----------|----------|
| O2-C7    | 1.329(3) | O2-C8    | 1.443(4) |
| O3-C7    | 1.211(3) | O8-C23   | 1.331(3) |
| O8-C24   | 1.440(3) | O5-C15   | 1.332(3) |
| O5-C16   | 1.445(4) | O6-C15   | 1.210(3) |
| O9-C23   | 1.213(3) | O7-C20   | 1.362(3) |
| O7-H7    | 0.82     | O1-C4    | 1.353(3) |
| O1-H1    | 0.82     | O4-C12   | 1.350(3) |
| O4-H4    | 0.82     | C18-C19  | 1.384(4) |
| C18-C17  | 1.393(4) | C18-H18  | 0.93     |
| C1-C6    | 1.396(3) | C1-C2    | 1.398(3) |
| C1-C7    | 1.470(4) | C9-C10   | 1.396(4) |
| C9-C14   | 1.397(3) | C9-C15   | 1.472(3) |
| C23-C17  | 1.479(4) | C22-C21  | 1.375(4) |
| C22-C17  | 1.384(4) | C22-H22  | 0.93     |
| C20-C19  | 1.378(4) | C20-C21  | 1.393(4) |
| C3-C2    | 1.379(4) | C3-C4    | 1.392(4) |
| C3-H3    | 0.93     | C19-H19  | 0.93     |
| C6-C5    | 1.375(4) | C6-H6    | 0.93     |
| C5-C4    | 1.385(4) | C5-H5    | 0.93     |
| C13-C14  | 1.370(4) | C13-C12  | 1.388(4) |
| C13-H13  | 0.93     | C11-C10  | 1.371(4) |
| C11-C12  | 1.390(4) | C11-H11  | 0.93     |
| C21-H21  | 0.93     | C10-H10  | 0.93     |
| C8-H8A   | 0.96     | C8-H8B   | 0.96     |
| C8-H8C   | 0.96     | C24-H24A | 0.96     |
| C24-H24B | 0.96     | C24-H24C | 0.96     |
| C16-H16A | 0.96     | C16-H16B | 0.96     |
| C16-H16C | 0.96     | C2-H2    | 0.93     |

#### Bond angles (°)

|             |          |             |          |
|-------------|----------|-------------|----------|
| C7-O2-C8    | 116.8(3) | C23-O8-C24  | 117.5(2) |
| C15-O5-C16  | 116.7(2) | C20-O7-H7   | 109.5    |
| C4-O1-H1    | 109.5    | C12-O4-H4   | 109.5    |
| C19-C18-C17 | 120.1(2) | C19-C18-H18 | 119.9    |
| C17-C18-H18 | 119.9    | C6-C1-C2    | 118.4(3) |
| C6-C1-C7    | 118.8(2) | C2-C1-C7    | 122.8(2) |
| C10-C9-C14  | 118.2(2) | C10-C9-C15  | 119.2(2) |
| C14-C9-C15  | 122.6(2) | O9-C23-O8   | 122.2(3) |
| O9-C23-C17  | 124.5(2) | O8-C23-C17  | 113.3(2) |
| C21-C22-C17 | 121.2(2) | C21-C22-H22 | 119.4    |
| C17-C22-H22 | 119.4    | O7-C20-C19  | 122.7(3) |
| O7-C20-C21  | 117.3(2) | C19-C20-C21 | 120.1(3) |
| O3-C7-O2    | 122.0(2) | O3-C7-C1    | 124.9(2) |
| O2-C7-C1    | 113.1(2) | C2-C3-C4    | 119.8(2) |
| C2-C3-H3    | 120.1    | C4-C3-H3    | 120.1    |
| O6-C15-O5   | 122.1(3) | O6-C15-C9   | 125.1(2) |
| O5-C15-C9   | 112.7(2) | C20-C19-C18 | 120.2(3) |

|                      |          |                      |          |
|----------------------|----------|----------------------|----------|
| <b>C20-C19-H19</b>   | 119.9    | <b>C18-C19-H19</b>   | 119.9    |
| <b>C22-C17-C18</b>   | 119.0(2) | <b>C22-C17-C23</b>   | 119.2(2) |
| <b>C18-C17-C23</b>   | 121.8(2) | <b>C5-C6-C1</b>      | 120.8(2) |
| <b>C5-C6-H6</b>      | 119.6    | <b>C1-C6-H6</b>      | 119.6    |
| <b>C6-C5-C4</b>      | 120.3(2) | <b>C6-C5-H5</b>      | 119.9    |
| <b>C4-C5-H5</b>      | 119.9    | <b>C14-C13-C12</b>   | 120.1(3) |
| <b>C14-C13-H13</b>   | 120.0    | <b>C12-C13-H13</b>   | 120.0    |
| <b>C10-C11-C12</b>   | 119.9(2) | <b>C10-C11-H11</b>   | 120.0    |
| <b>C12-C11-H11</b>   | 120.0    | <b>C22-C21-C20</b>   | 119.4(2) |
| <b>C22-C21-H21</b>   | 120.3    | <b>C20-C21-H21</b>   | 120.3    |
| <b>C11-C10-C9</b>    | 121.1(3) | <b>C11-C10-H10</b>   | 119.5    |
| <b>C9-C10-H10</b>    | 119.5    | <b>O1-C4-C5</b>      | 117.5(2) |
| <b>O1-C4-C3</b>      | 122.7(2) | <b>C5-C4-C3</b>      | 119.8(2) |
| <b>O2-C8-H8A</b>     | 109.5    | <b>O2-C8-H8B</b>     | 109.5    |
| <b>H8A-C8-H8B</b>    | 109.5    | <b>O2-C8-H8C</b>     | 109.5    |
| <b>H8A-C8-H8C</b>    | 109.5    | <b>H8B-C8-H8C</b>    | 109.5    |
| <b>O4-C12-C13</b>    | 122.9(3) | <b>O4-C12-C11</b>    | 117.4(2) |
| <b>C13-C12-C11</b>   | 119.7(3) | <b>O8-C24-H24A</b>   | 109.5    |
| <b>O8-C24-H24B</b>   | 109.5    | <b>H24A-C24-H24B</b> | 109.5    |
| <b>O8-C24-H24C</b>   | 109.5    | <b>H24A-C24-H24C</b> | 109.5    |
| <b>H24B-C24-H24C</b> | 109.5    | <b>O5-C16-H16A</b>   | 109.5    |
| <b>O5-C16-H16B</b>   | 109.5    | <b>H16A-C16-H16B</b> | 109.5    |
| <b>O5-C16-H16C</b>   | 109.5    | <b>H16A-C16-H16C</b> | 109.5    |
| <b>H16B-C16-H16C</b> | 109.5    | <b>C3-C2-C1</b>      | 120.9(2) |
| <b>C3-C2-H2</b>      | 119.6    | <b>C1-C2-H2</b>      | 119.6    |
| <b>C13-C14-C9</b>    | 121.0(2) | <b>C13-C14-H14</b>   | 119.5    |
| <b>C9-C14-H14</b>    | 119.5    |                      |          |

(ii) Melt grown p-MHB crystal

Atomic displacement parameters (Å<sup>2</sup>)

|            | U <sub>11</sub> | U <sub>22</sub> | U <sub>33</sub> | U <sub>23</sub> | U <sub>13</sub> | U <sub>12</sub> |
|------------|-----------------|-----------------|-----------------|-----------------|-----------------|-----------------|
| <b>O2</b>  | 0.0466(10)      | 0.0496(9)       | 0.0319(8)       | -0.0023(7)      | 0.0149(7)       | -0.0084(8)      |
| <b>O3</b>  | 0.0545(11)      | 0.0596(11)      | 0.0321(10)      | -0.0007(8)      | 0.0069(9)       | -0.0051(9)      |
| <b>O5</b>  | 0.0540(11)      | 0.0475(9)       | 0.0418(9)       | 0.0001(8)       | 0.0215(8)       | 0.0078(9)       |
| <b>O8</b>  | 0.0497(11)      | 0.0482(10)      | 0.0362(9)       | 0.0005(8)       | 0.0183(8)       | 0.0110(9)       |
| <b>O6</b>  | 0.0588(12)      | 0.0511(11)      | 0.0401(11)      | -0.0001(8)      | 0.0086(9)       | 0.0049(9)       |
| <b>O7</b>  | 0.0604(15)      | 0.0557(12)      | 0.0489(13)      | -0.0022(10)     | 0.0216(12)      | 0.0186(11)      |
| <b>O9</b>  | 0.0499(11)      | 0.0507(11)      | 0.0370(11)      | 0.0021(8)       | 0.0080(9)       | 0.0077(9)       |
| <b>O1</b>  | 0.0596(13)      | 0.0556(11)      | 0.0430(11)      | 0.0006(9)       | 0.0209(10)      | -0.0133(10)     |
| <b>O4</b>  | 0.0578(13)      | 0.0645(13)      | 0.0471(11)      | 0.0000(9)       | 0.0195(10)      | 0.0198(10)      |
| <b>C22</b> | 0.0434(15)      | 0.0434(14)      | 0.0316(14)      | -0.0028(10)     | 0.0182(12)      | -0.0005(12)     |
| <b>C1</b>  | 0.0363(13)      | 0.0415(12)      | 0.0261(11)      | -0.0001(9)      | 0.0136(10)      | 0.0075(10)      |
| <b>C9</b>  | 0.0381(13)      | 0.0377(12)      | 0.0341(13)      | -0.0021(9)      | 0.0157(11)      | -0.0071(11)     |
| <b>C23</b> | 0.0358(14)      | 0.0379(13)      | 0.0333(13)      | -0.0002(10)     | 0.0151(12)      | -0.0064(10)     |
| <b>C20</b> | 0.0383(14)      | 0.0405(14)      | 0.0410(16)      | -0.0014(11)     | 0.0188(12)      | 0.0005(11)      |
| <b>C7</b>  | 0.0394(13)      | 0.0406(12)      | 0.0292(11)      | -0.0023(9)      | 0.0144(11)      | 0.0053(10)      |
| <b>C18</b> | 0.0398(15)      | 0.0496(15)      | 0.0277(12)      | -0.0011(10)     | 0.0081(11)      | 0.0016(12)      |
| <b>C19</b> | 0.0519(18)      | 0.0521(16)      | 0.0344(15)      | -0.0099(12)     | 0.0168(14)      | 0.0021(13)      |
| <b>C3</b>  | 0.0392(14)      | 0.0466(14)      | 0.0250(11)      | -0.0019(9)      | 0.0107(10)      | 0.0014(11)      |
| <b>C24</b> | 0.0485(17)      | 0.0414(15)      | 0.0537(17)      | 0.0006(14)      | 0.0263(15)      | 0.0057(13)      |
| <b>C15</b> | 0.0427(14)      | 0.0354(12)      | 0.0387(13)      | -0.0004(10)     | 0.0177(12)      | -0.0069(10)     |
| <b>C17</b> | 0.0346(13)      | 0.0361(12)      | 0.0344(13)      | 0.0003(10)      | 0.0169(12)      | -0.0025(10)     |

|            |            |            |            |             |            |             |
|------------|------------|------------|------------|-------------|------------|-------------|
| <b>C6</b>  | 0.0435(13) | 0.0506(14) | 0.0251(11) | 0.0006(10)  | 0.0136(10) | 0.0029(11)  |
| <b>C21</b> | 0.0406(14) | 0.0482(15) | 0.0332(13) | 0.0019(11)  | 0.0165(12) | 0.0014(12)  |
| <b>C4</b>  | 0.0394(13) | 0.0423(13) | 0.0350(13) | 0.0004(10)  | 0.0186(11) | 0.0038(10)  |
| <b>C11</b> | 0.0430(14) | 0.0544(15) | 0.0316(13) | 0.0030(11)  | 0.0131(12) | 0.0020(12)  |
| <b>C14</b> | 0.0474(15) | 0.0518(15) | 0.0310(12) | -0.0033(11) | 0.0139(11) | -0.0024(12) |
| <b>C5</b>  | 0.0485(16) | 0.0517(14) | 0.0297(12) | 0.0076(11)  | 0.0181(12) | 0.0022(12)  |
| <b>C12</b> | 0.0395(14) | 0.0467(14) | 0.0415(15) | -0.0012(11) | 0.0179(12) | -0.0007(11) |
| <b>C2</b>  | 0.0415(13) | 0.0450(13) | 0.0249(12) | 0.0027(9)   | 0.0143(11) | 0.0013(11)  |
| <b>C16</b> | 0.0555(18) | 0.0424(14) | 0.0577(18) | 0.0018(13)  | 0.0283(15) | 0.0031(13)  |
| <b>C8</b>  | 0.0518(16) | 0.0515(13) | 0.0464(14) | -0.0054(11) | 0.0228(12) | -0.0105(12) |
| <b>C10</b> | 0.0455(15) | 0.0507(15) | 0.0307(13) | -0.0056(10) | 0.0168(12) | -0.0028(12) |
| <b>C13</b> | 0.0503(18) | 0.0604(17) | 0.0357(14) | -0.0108(12) | 0.0171(14) | 0.0021(13)  |

Bond length (Å)

|                 |          |                 |          |
|-----------------|----------|-----------------|----------|
| <b>O2-C7</b>    | 1.326(3) | <b>O2-C8</b>    | 1.447(4) |
| <b>O3-C7</b>    | 1.212(3) | <b>O5-C15</b>   | 1.331(3) |
| <b>O5-C16</b>   | 1.445(3) | <b>O8-C23</b>   | 1.337(3) |
| <b>O8-C24</b>   | 1.439(3) | <b>O6-C15</b>   | 1.209(3) |
| <b>O7-C20</b>   | 1.363(3) | <b>O7-H7</b>    | 0.82     |
| <b>O9-C23</b>   | 1.214(3) | <b>O1-C4</b>    | 1.349(3) |
| <b>O1-H1</b>    | 0.82     | <b>O4-C12</b>   | 1.350(3) |
| <b>O4-H4</b>    | 0.82     | <b>C22-C21</b>  | 1.382(4) |
| <b>C22-C17</b>  | 1.390(4) | <b>C22-H22</b>  | 0.93     |
| <b>C1-C6</b>    | 1.398(3) | <b>C1-C2</b>    | 1.400(3) |
| <b>C1-C7</b>    | 1.466(4) | <b>C9-C14</b>   | 1.396(4) |
| <b>C9-C10</b>   | 1.397(3) | <b>C9-C15</b>   | 1.474(3) |
| <b>C23-C17</b>  | 1.479(4) | <b>C20-C21</b>  | 1.381(4) |
| <b>C20-C19</b>  | 1.389(4) | <b>C18-C19</b>  | 1.375(4) |
| <b>C18-C17</b>  | 1.387(4) | <b>C18-H18</b>  | 0.93     |
| <b>C19-H19</b>  | 0.93     | <b>C3-C2</b>    | 1.379(4) |
| <b>C3-C4</b>    | 1.394(3) | <b>C3-H3</b>    | 0.93     |
| <b>C24-H24A</b> | 0.96     | <b>C24-H24B</b> | 0.96     |
| <b>C24-H24C</b> | 0.96     | <b>C6-C5</b>    | 1.375(4) |
| <b>C6-H6</b>    | 0.93     | <b>C21-H21</b>  | 0.93     |
| <b>C4-C5</b>    | 1.388(4) | <b>C11-C10</b>  | 1.372(4) |
| <b>C11-C12</b>  | 1.385(4) | <b>C11-H11</b>  | 0.93     |
| <b>C14-C13</b>  | 1.369(4) | <b>C14-H14</b>  | 0.93     |
| <b>C5-H5</b>    | 0.93     | <b>C12-C13</b>  | 1.392(4) |
| <b>C2-H2</b>    | 0.93     | <b>C16-H16A</b> | 0.96     |
| <b>C16-H16B</b> | 0.96     | <b>C16-H16C</b> | 0.96     |
| <b>C8-H8A</b>   | 0.96     | <b>C8-H8B</b>   | 0.96     |
| <b>C8-H8C</b>   | 0.96     | <b>C10-H10</b>  | 0.93     |
| <b>C13-H13</b>  | 0.93     |                 |          |

Bond angles (°)

|                   |          |                   |          |
|-------------------|----------|-------------------|----------|
| <b>C7-O2-C8</b>   | 116.8(2) | <b>C15-O5-C16</b> | 116.7(2) |
| <b>C23-O8-C24</b> | 117.4(2) | <b>C20-O7-H7</b>  | 109.5    |
| <b>C4-O1-H1</b>   | 109.5    | <b>C12-O4-H4</b>  | 109.5    |

|                      |          |                      |            |
|----------------------|----------|----------------------|------------|
| <b>C21-C22-C17</b>   | 120.2(2) | <b>C21-C22-H22</b>   | 119.9      |
| <b>C17-C22-H22</b>   | 119.9    | <b>C6-C1-C2</b>      | 118.2(2)   |
| <b>C6-C1-C7</b>      | 119.0(2) | <b>C2-C1-C7</b>      | 122.8(2)   |
| <b>C14-C9-C10</b>    | 118.2(2) | <b>C14-C9-C15</b>    | 119.2(2)   |
| <b>C10-C9-C15</b>    | 122.6(2) | <b>O9-C23-O8</b>     | 122.0(3)   |
| <b>O9-C23-C17</b>    | 124.9(2) | <b>O8-C23-C17</b>    | 113.2(2)   |
| <b>O7-C20-C21</b>    | 122.6(3) | <b>O7-C20-C19</b>    | 117.4(2)   |
| <b>C21-C20-C19</b>   | 120.0(2) | <b>O3-C7-O2</b>      | 122.1(2)   |
| <b>O3-C7-C1</b>      | 124.8(2) | <b>O2-C7-C1</b>      | 113.16(19) |
| <b>C19-C18-C17</b>   | 120.8(2) | <b>C19-C18-H18</b>   | 119.6      |
| <b>C17-C18-H18</b>   | 119.6    | <b>C18-C19-C20</b>   | 119.8(2)   |
| <b>C18-C19-H19</b>   | 120.1    | <b>C20-C19-H19</b>   | 120.1      |
| <b>C2-C3-C4</b>      | 119.9(2) | <b>C2-C3-H3</b>      | 120.1      |
| <b>C4-C3-H3</b>      | 120.1    | <b>O8-C24-H24A</b>   | 109.5      |
| <b>O8-C24-H24B</b>   | 109.5    | <b>H24A-C24-H24B</b> | 109.5      |
| <b>O8-C24-H24C</b>   | 109.5    | <b>H24A-C24-H24C</b> | 109.5      |
| <b>H24B-C24-H24C</b> | 109.5    | <b>O6-C15-O5</b>     | 122.3(2)   |
| <b>O6-C15-C9</b>     | 125.0(2) | <b>O5-C15-C9</b>     | 112.6(2)   |
| <b>C18-C17-C22</b>   | 119.2(2) | <b>C18-C17-C23</b>   | 118.9(2)   |
| <b>C22-C17-C23</b>   | 121.9(2) | <b>C5-C6-C1</b>      | 121.0(2)   |
| <b>C5-C6-H6</b>      | 119.5    | <b>C1-C6-H6</b>      | 119.5      |
| <b>C20-C21-C22</b>   | 120.1(3) | <b>C20-C21-H21</b>   | 120.0      |
| <b>C22-C21-H21</b>   | 120.0    | <b>O1-C4-C5</b>      | 117.5(2)   |
| <b>O1-C4-C3</b>      | 122.9(2) | <b>C5-C4-C3</b>      | 119.6(2)   |
| <b>C10-C11-C12</b>   | 120.1(2) | <b>C10-C11-H11</b>   | 119.9      |
| <b>C12-C11-H11</b>   | 119.9    | <b>C13-C14-C9</b>    | 121.2(2)   |
| <b>C13-C14-H14</b>   | 119.4    | <b>C9-C14-H14</b>    | 119.4      |
| <b>C6-C5-C4</b>      | 120.3(2) | <b>C6-C5-H5</b>      | 119.8      |
| <b>C4-C5-H5</b>      | 119.8    | <b>O4-C12-C11</b>    | 122.7(3)   |
| <b>O4-C12-C13</b>    | 117.5(2) | <b>C11-C12-C13</b>   | 119.8(2)   |
| <b>C3-C2-C1</b>      | 121.0(2) | <b>C3-C2-H2</b>      | 119.5      |
| <b>C1-C2-H2</b>      | 119.5    | <b>O5-C16-H16A</b>   | 109.5      |
| <b>O5-C16-H16B</b>   | 109.5    | <b>H16A-C16-H16B</b> | 109.5      |
| <b>O5-C16-H16C</b>   | 109.5    | <b>H16A-C16-H16C</b> | 109.5      |
| <b>H16B-C16-H16C</b> | 109.5    | <b>O2-C8-H8A</b>     | 109.5      |
| <b>O2-C8-H8B</b>     | 109.5    | <b>H8A-C8-H8B</b>    | 109.5      |
| <b>O2-C8-H8C</b>     | 109.5    | <b>H8A-C8-H8C</b>    | 109.5      |
| <b>H8B-C8-H8C</b>    | 109.5    | <b>C11-C10-C9</b>    | 120.9(2)   |
| <b>C11-C10-H10</b>   | 119.6    | <b>C9-C10-H10</b>    | 119.6      |
| <b>C14-C13-C12</b>   | 119.8(2) | <b>C14-C13-H13</b>   | 120.1      |
| <b>C12-C13-H13</b>   | 120.1    |                      |            |
